# ANESTHESIOLOGY

## Effect of Extracerebral Contamination on Near-infrared Spectroscopy as Revealed during Organ Donation: A Prospective Observational Study in Brain-dead Organ Donors

Martin Soehle, M.D., Ph.D., M.H.B.A., Juliane Langer, M.S., Ehrenfried Schindler, M.D., Ph.D., Steffen Manekeller, M.D., Ph.D., Mark Coburn, M.D., Ph.D., Marcus Thudium, M.D., Ph.D.

ANESTHESIOLOGY 2024; 140:231–9

### EDITOR'S PERSPECTIVE

#### What We Already Know about This Topic

- Near-infrared spectroscopy is commonly used as a clinical measure of cerebral perfusion and oxygenation
- It is still unclear how much, and in what circumstances, perfusion of extracerebral tissues influences the output of the monitor

#### What This Article Tells Us That Is New

- Brain-dead patients (who have absent cerebral circulation) show surprisingly high cerebral oxygen saturation, which then drops when the aorta is clamped and extracerebral circulation ceases
- These observations call into question the reliability of near-infrared spectroscopy in detecting isolated cerebral ischemia

### ABSTRACT

**Background:** Near-infrared spectroscopy (NIRS) has been utilized widely in anesthesia and intensive care to monitor regional cerebral oxygen saturation ( $rScO_2$ ). A normal oxygenation of extracerebral tissues may overlay and thereby mask cerebral desaturations, a phenomenon known as extracerebral contamination. The authors investigated the effect of a cessation of extracerebral tissue perfusion on  $rScO_2$  in patients with anoxic brains.

**Methods:** In a single-center, prospective, observational study, brain-dead adults undergoing organ donation were investigated.  $rScO_2$  was measured bifrontally using the INVOS 5100C/7100 as well as the ForeSight Elite system. To achieve an efficient conservation of organs and to prevent a redistribution of the perfusion fluid to other tissues, the aorta was clamped before organ perfusion.  $rScO_2$  was monitored until at least 40 min after aortic clamping. The primary outcome was the amount of extracerebral contamination as quantified by the absolute decrease in  $rScO_2$  after aortic clamping. Secondary outcomes were the absolute  $rScO_2$  values obtained before and after clamping.

**Results:** Twelve organ donors were included. Aortic clamping resulted in a significantly ( $P < 0.001$ ) greater absolute decrease in  $rScO_2$  when comparing the INVOS ( $43.0 \pm 9.5\%$ ) to the ForeSight ( $27.8 \pm 7.1\%$ ) monitor. Before aortic clamping, near-normal  $rScO_2$  values were obtained by the INVOS ( $63.8 \pm 6.2\%$ ) and the ForeSight monitor ( $67.7 \pm 6.5\%$ ). The  $rScO_2$  significantly ( $P < 0.001$ ) dropped to  $20.8 \pm 7.8\%$  (INVOS) and  $39.9 \pm 8.1\%$  (ForeSight) 30 min after clamping, i.e., a condition of a desaturation of both extracerebral and cerebral tissues.

**Conclusions:** The abrupt end of extracerebral contamination, caused by aortic clamping, affected both NIRS monitors to a considerable extent. Both the INVOS and the ForeSight monitor were unable to detect severe cerebral hypoxia or anoxia under conditions of normal extracerebral oxygenation. While both NIRS monitors may guide measures to optimize arterial oxygen supply to the head, they should not be used with the intention to detect isolated cerebral desaturations.

(ANESTHESIOLOGY 2024; 140:231–9)

Near-infrared spectroscopy (NIRS) is an established technique to monitor cerebral oxygenation in anesthesia and intensive care medicine.<sup>1–3</sup> It is based on the phenomenon that oxygenated and deoxygenated hemoglobin

Submitted for publication July 12, 2023. Accepted for publication October 23, 2023. Published online first on November 8, 2023.

Martin Soehle, M.D., Ph.D., M.H.B.A.: Department of Anesthesiology and Intensive Care Medicine, and Inhouse Transplant Coordination Office of the Medical Director, University Hospital Bonn, Bonn, Germany.

Juliane Langer, M.S.: Inhouse Transplant Coordination Office of the Medical Director, University Hospital Bonn, Bonn, Germany.

Ehrenfried Schindler, M.D., Ph.D.: Department of Anesthesiology and Intensive Care Medicine, University Hospital Bonn, Bonn, Germany.

Steffen Manekeller, M.D., Ph.D.: Department of General, Visceral, Thoracic and Vascular Surgery, University Hospital Bonn, Bonn, Germany.

Mark Coburn, M.D., Ph.D.: Department of Anesthesiology and Intensive Care Medicine, University Hospital Bonn, Bonn, Germany.

Marcus Thudium, M.D., Ph.D.: Department of Anesthesiology and Intensive Care Medicine, University Hospital Bonn, Bonn, Germany.

Copyright © 2023 The Author(s). Published by Wolters Kluwer Health, Inc., on behalf of the American Society of Anesthesiologists. This is an open-access article distributed under the terms of the Creative Commons Attribution-Non Commercial-No Derivatives License 4.0 (CCBY-NC-ND), where it is permissible to download and share the work provided it is properly cited. The work cannot be changed in any way or used commercially without permission from the journal. ANESTHESIOLOGY 2024; 140:231–9. DOI: 10.1097/ALN.0000000000004828

The article processing charge was funded by the Department of Anesthesiology and Intensive Care Medicine, University Hospital Bonn.

differ in their absorption spectrum of near-infrared light. On the path from the light emitter to the light detector, the photons pass through the scalp, the cranial bone, and cerebral tissue, which differ in their vessel supply in such a way that only the last is supplied by intracranial vessels originating from the internal carotid artery (ICA) (fig. 1). In contrast, the first two are supplied by the external carotid artery (ECA) and are therefore not affected by intracranial pathologies. Although NIRS was developed with the aim of measuring intracranial oxygen saturation, extracranial oxygen saturation may overlay and affect the NIRS signal for the anatomical reasons mentioned above. This interfering influence is known as extracerebral contamination<sup>4-8</sup> and is thought to be minimized by spatial resolution when using two light receivers.<sup>3</sup> Since the photons then reach the receiver *via* two different light paths (fig. 1), which are influenced by the extracranial saturation to a different extent, the effect of extracerebral contamination can theoretically be eliminated or at least reduced.<sup>9</sup>

Brain death is characterized by cerebral perfusion arrest resulting in brain anoxia. Therefore, cerebral oxygen saturation in brain-dead patients should theoretically be at 0%. However, NIRS studies in these patients revealed either a regional cerebral oxygen saturation ( $rScO_2$ ) of  $74 \pm 4\%$ , similar to healthy volunteers ( $74 \pm 6\%$ ),<sup>10</sup> or a wide range of  $rScO_2$  values ( $51 \pm 27\%$ )<sup>11</sup> extending up into the normal range.

These unintuitive high  $rScO_2$  values are presumably caused by extracerebral contamination.<sup>4,6-8,12</sup> This effect has been investigated under conditions of either cerebral normoxia and extracerebral ischemia<sup>4,6,7</sup> or combined cerebral and extracerebral hypoxia,<sup>8,12-14</sup> but not during normal extracerebral oxygenation. To serve as monitors of cerebral oxygenation, NIRS devices are expected to yield valid results, including the clinical situation of a normal extracerebral perfusion but a suspected cerebral desaturation.

Therefore, we performed a prospective study in brain-dead organ donors. The objective was to investigate extracerebral contamination by comparing the times with normal extracerebral perfusion and extracerebral perfusion arrest caused by organ donation.

## Materials and Methods

With approval of the local ethics committee (Medical Faculty of the University Bonn, Bonn, Germany; reference No. 416/22-EP), we performed a single-center, prospective, observational study at the University Hospital Bonn (Bonn, Germany). Written informed consent was waived by the institutional review board according to §6 of the North Rhine-Westphalian Health Data Protection Act. Patients were recruited from June 2021 to June 2023. This manuscript satisfies the STrengthening the Reporting of OBservational studies in Epidemiology (STROBE) criteria for observational studies.

Brain-dead adults undergoing surgery for organ donation were included. Children and adolescents were excluded. In

Germany, brain death is officially called “irreversible loss of brain function” and described as “the final, irreversible loss of all function of the cerebrum, cerebellum, and brainstem” in §3 of the German Transplantation Law.<sup>15</sup> Irreversible loss of brain function was diagnosed based on the clinical manifestations of coma, absent brainstem reflexes, and apnea by at least two experts with several years of experience in intensive care of brain-injured patients, one of whom had to be a neurologist or neurosurgeon. Irreversibility was demonstrated by supplementary testing (electroencephalogram, perfusion scintigraphy, or computed tomography [CT] angiogram) or by confirming the abovementioned clinical manifestations after a waiting period. Permission for organ donation was obtained under the “opt-in” system, requiring informed consent either by patients during their lifetimes or by the relatives at the time of death.

After organ allocation, patients were transferred to the operation theater for multiorgan donation. NIRS devices from two different manufacturers were applied. The first NIRS monitor was the ForeSight Elite Tissue Oximeter Module (CAS Medical Systems, Inc., USA), which was connected to a HemoSphere Advanced Monitor (Edwards Lifesciences Corp., USA). The ForeSight Elite employs five wavelengths of light (690, 730, 770, 810, and 870 nm) with two detectors 15 and 50 mm apart from the light source.<sup>3</sup> The second NIRS device was the INVOS 5100C or 7100 monitor (Medtronic Inc., USA), which differed in their design but not their algorithm to measure cerebral oxygenation.<sup>16</sup> Therefore, they were regarded as identical monitors. The INVOS device provided two wavelengths of light (730 and 810 nm), with a distance between the light source and the two detectors of 30 and 40 mm.<sup>3</sup> NIRS optodes were placed on the patient's forehead above the frontal cortex according to the manufacturer's recommendations. Ventilator settings and circulatory support were chosen to maintain cardiorespiratory parameters in the physiologic range. The fraction of inspired oxygen was set to maintain peripheral arterial oxygen saturation above 92%. Only in cases of lung donation, the fraction of inspired oxygen was set to 1.0 at certain times. Muscle relaxants and opioids were given before skin incision to blunt spinal reflexes. Open laparotomy and/or thoracotomy was performed depending on the organs donated.

To allow for later replacement of the 37°C warm blood by cold perfusion liquid, the (abdominal and/or thoracic) aorta was cannulated for perfusion fluid inflow. Heparin was given intravenously (400 units/kg body weight), the inferior vena cava (and/or the right atrium of the heart) was opened for outflow of venous blood, and organ perfusion was started. To achieve a better organ preservation and to prevent distribution of the perfusion fluid to other body regions (e.g., extremities or head), the aorta was clamped. For perfusion of abdominal organs, the aorta was clamped below the diaphragm, enabling a retrograde flow from the inflow cannula *via* the abdominal aorta to abdominal organs.

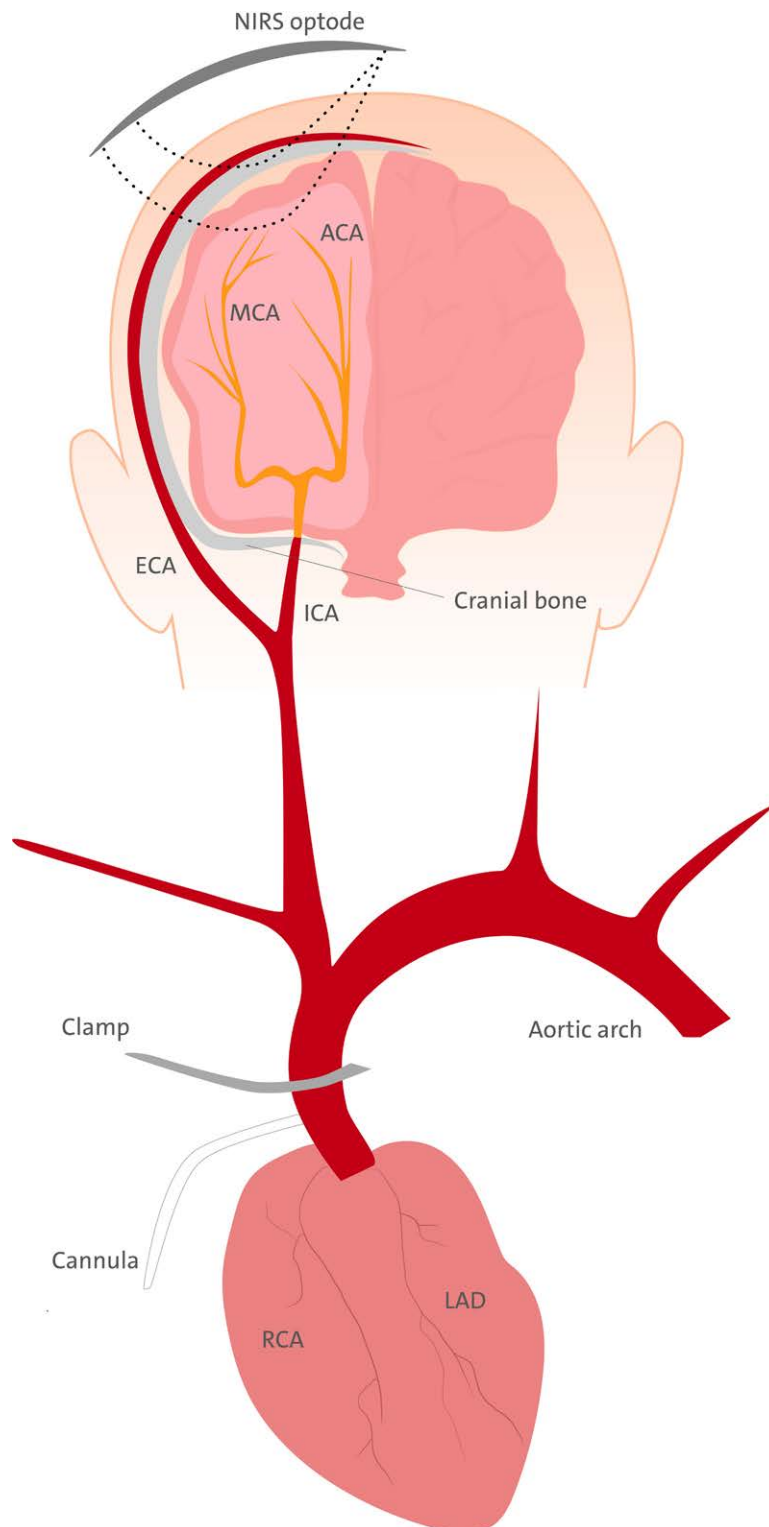

**Fig. 1.** Illustration of the arterial blood supply to the head, the brain, and the heart. The common carotid artery divides into the external carotid artery (ECA), which supplies the scalp as well as the cranial bone, and the internal carotid artery (ICA), which feeds the brain *via* its branches anterior (ACA) and middle cerebral arteries (MCA). During irreversible loss of brain function, neither the ACA nor the MCA (nor any other cerebral vessel) is perfused, as shown by the *yellow* color. According to the light path of the near-infrared spectroscopy (NIRS) optode (*upper*), NIRS is affected by perfusion of both ICA and ECA. The ascending aorta is clamped to facilitate perfusion of the coronary arteries with cold perfusion liquid. Clamping results in a sudden cessation of arterial blood supply to the ECA. LAD, left anterior descending artery; RCA, right coronary artery.

In contrast, the heart was perfused as known from coronary artery bypass grafting. The ascending aorta was clamped and coronary arteries were perfused from an inflow cannula positioned proximal to the clamp (fig. 1). Therefore, blood flow to the head and its extracerebral tissue ceased immediately after aortic clamping, whereas the blood flow to the brain had already stopped hours earlier when irreversible loss of brain function was diagnosed. Asystole occurred soon after aortic clamping, and any circulatory support by fluids or catecholamines was stopped. Respiration was terminated except for cases of lung donation (where it was maintained until the end of lung explantation).

$rScO_2$  was measured by NIRS from the beginning of surgery until at least 40 min after aortic clamping, or until skin closure was performed. NIRS data were stored on a universal serial bus stick for later analysis. NIRS data were imported, synchronized, and analyzed using in-house written software (MATLAB, MathWorks, USA).

The primary outcome was the absolute decline in  $rScO_2$  after aortic clamping, which was determined by comparing the  $rScO_2$  obtained during the minute before aortic clamping with the 1-min period 30 min after clamping. Hence,  $rScO_2$  values were time-averaged during these 1-min periods. Secondary outcomes were the relative decrease in  $rScO_2$  at the abovementioned time points, as well as the detailed time course of  $rScO_2$  until 40 min after aortic clamping.

### Statistical Analysis

A data analysis and statistical plan was written and filed with the institutional review board before data were accessed. The primary endpoint is a combination of both NIRS devices; we hypothesized that both devices showed a decrease in  $rScO_2$  values. This hypothesis was tested by a paired *t* test (before *vs.* 30 min after clamping) separately for both devices. Only if both tests showed a significant decrease at a significance level of 0.01 was the null hypothesis (no decrease in either device) rejected. Data were tested for normal distribution using the Shapiro–Wilk test before the paired *t* test was applied. To account for multiple measurements within one participant (two devices and time points per participant), we used a linear mixed model to assess the differences between devices and time points. The participant identifier was included as random intercept in the regression model. We performed five statistical tests (two for the combined primary endpoint and three for the linear mixed model).

A Bonferroni correction was applied to correct for multiple ( $n = 5$ ) statistical testing, and statistical significance was therefore assumed at a  $P < 0.05/5 = 0.01$ . A power analysis was performed assuming an expected difference in  $rScO_2$  means of 8% and an expected SD of 6%. For a desired sample size of 12 and  $P = 0.05/5 = 0.01$ , a power of 0.91 was calculated. Statistical analysis was performed using SigmaPlot (Version 14.0, Systat, Inpixon, USA). Unless

otherwise mentioned, values are shown as mean  $\pm$  SD, and changes in  $rScO_2$  are absolute saturation changes (expressed in percent saturation), and not relative changes in the sense of a change by  $\times$  percent.

### Results

A total of 15 organ donors were investigated, of whom 3 were excluded, in whom only one of the two NIRS monitors was available, leaving 12 patients for final analysis. They consisted of seven women and five men with a mean age of  $52.6 \pm 18.1$  yr, ranging between 25 and 83 yr. Supplementary diagnostics were performed in 11 patients in addition to clinical testing: an isoelectric electroencephalogram was obtained in 9 patients, and cerebral perfusion arrest was shown by CT angiography in 2 patients.

Before aortic clamping, 9 of 12 donors showed normal  $rScO_2$  in the range between 60% and 80%, according to both monitors. The lowest observed  $rScO_2$  was 54% for the INVOS and 58% for the ForeSight monitor. Aortic clamping was associated with a significant ( $P < 0.001$ ) drop in  $rScO_2$  from  $63.8 \pm 6.2\%$  to  $20.8 \pm 7.8\%$  30 min thereafter according to the INVOS monitor (fig. 2). The lower measurement limit of the INVOS monitor ( $rScO_2 = 15\%$ ) was reached in 7 of the 12 patients (fig. 3). The ForeSight monitor showed a significant ( $P < 0.001$ ) drop in  $rScO_2$  from  $67.7 \pm 6.5\%$  before clamping to  $39.9 \pm 8.1\%$  30 min after clamping (fig. 2). The lowest observed  $rScO_2$  value was 24%, and a lower measurement threshold was never reached with this monitor (fig. 3).

The linear mixed model showed no significant difference in  $rScO_2$  between the devices during the minute before clamping (table 1). Aortic clamping was associated with a significant ( $P < 0.0001$ ) drop in  $rScO_2$  by 27.8% (absolute saturation) as assessed using the ForeSight device. For the INVOS device, this drop is 15.2% (absolute saturation) more pronounced than for the ForeSight device, *i.e.*, the  $rScO_2$  drop is significantly ( $P = 0.0003$ ) different between the two devices (table 1).

The detailed time course of  $rScO_2$  is shown in figures 3 and 4 for individual patients and the entire study population, respectively. From the time point 2 min after clamping, the INVOS monitor showed a significantly ( $P < 0.01$ ) lower  $rScO_2$  than the ForeSight monitor.

Both the absolute and the relative decrease in  $rScO_2$  were significantly more pronounced using the INVOS monitor ( $43.0 \pm 9.5\%$  and  $67.2 \pm 12.3\%$ , respectively) as compared to the ForeSight device ( $27.8 \pm 7.1\%$ ,  $P < 0.001$ , and  $41.2 \pm 10.4\%$ ,  $P < 0.001$ ).

### Discussion

During organ donation in brain-dead patients, we observed three phenomena that require consideration. First, near-normal  $rScO_2$  values were measured at the

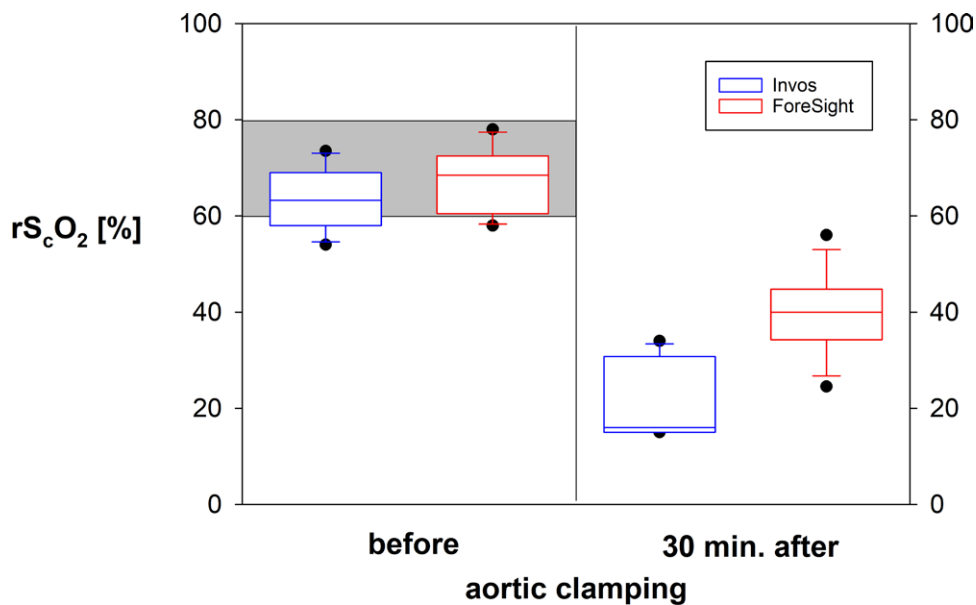

**Fig. 2.** The regional cerebral oxygen saturation ( $rS_cO_2$ ) is shown comparing two NIRS devices (INVOS 5100/7100 [Medtronic Inc., USA] and ForeSight [CAS Medical Systems, Inc., USA]) and the two time periods before aortic clamping and 30 min thereafter. Clamping was associated with a significantly ( $P < 0.001$ ) greater drop in absolute  $rS_cO_2$  when comparing the INVOS ( $43.0 \pm 9.5\%$ ) to the ForeSight ( $27.8 \pm 7.1\%$ ) monitor. The *boxplots* indicate median and 25th and 75th percentiles, and the *circles* display 5th and 95th percentiles. The *gray area* denotes the normal range of  $rS_cO_2$  (60 to 80%) as expected in healthy volunteers breathing room air.

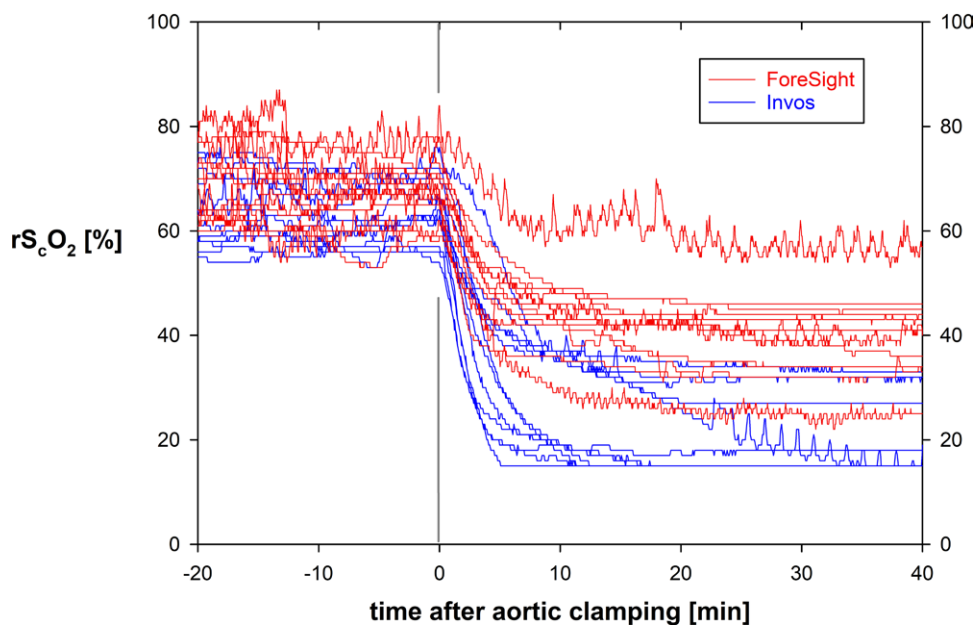

**Fig. 3.** Individual time course of regional cerebral oxygen saturation ( $rS_cO_2$ ), as assessed using the ForeSight (CAS Medical Systems, Inc., USA; illustrated in *red*) and the INVOS (Medtronic Inc., USA; illustrated in *blue*) monitors from 20 min before clamping to 40 min thereafter.

beginning of the operation despite the presence of cerebral anoxia. Second, a rapid drop in  $rS_cO_2$  was observed after aortic clamping, which was more pronounced with

the INVOS than the ForeSight monitor. Third,  $rS_cO_2$  remained well above 0 even at the end of surgery. The lowest observed  $rS_cO_2$  values at the end of surgery were





and cerebrospinal fluid, which all absorb NIRS light to some extent. Strategies have been developed to reduce extracerebral contamination by a dedicated sensor design with different light pathways<sup>3,9</sup>; however, our results refute this strategy as insufficient.

According to the characteristics of brain death, brain perfusion was absent during the entire donation procedure and thus never changed during surgery. Aortic clamping resulted in a sudden cessation of blood flow to the head and its extracerebral tissues only. The measured  $rScO_2$  dropped in line with these extracerebral perfusion changes, which supports the hypothesis that NIRS predominantly reflects extracerebral rather than cerebral oxygenation.<sup>12,19,20</sup> Davie and Grocott,<sup>4</sup> Greenberg *et al.*,<sup>6</sup> and Kato *et al.*<sup>7</sup> reported that the  $rScO_2$  as assessed using the INVOS monitor is more affected than the Foresight device when manipulating extracerebral perfusion under conditions of cerebral normoxia. Our results confirm that this holds true for conditions of cerebral anoxia as well. So far, the influence of extracerebral tissue on  $rScO_2$  can be quantified exactly only in computational simulation studies.<sup>21</sup> However, this has not yet been possible in *in vivo* human studies<sup>5</sup> such as ours. Nevertheless, our results contradict the estimation that only 15% of cerebral oximetry measurements are derived from extracerebral tissue and 85% from the superficial cerebrum.<sup>22</sup>

At first sight, the INVOS seems to be more sensitive to extracerebral contamination than the Foresight monitor. At the end of surgery, with its lack of both extracerebral and cerebral perfusion, we would have expected to monitor an  $rScO_2$  of approximately 0%, but neither monitor did so. In more than half of patients, the INVOS monitor reached its lower measurement threshold of 15%, indicating that any value between 0% and 15% might have occurred. In contrast, the Foresight device neither reached a lower limit nor fell less than 24%. Moreover, the final mean  $rScO_2$  was 40%, which raises concerns regarding the validity of the Foresight device to measure low cerebral oxygenations. To our knowledge, the monitor was validated against jugular bulb oximetry, but only for oxygen saturations above 52%.<sup>17</sup>

Murkin and Arango pointed out<sup>22</sup> that tissue oxygenation in the dying or dead brain could be high, low, or near normal because of remaining blood in capillaries and venous capacitance vessels.<sup>23</sup> Accordingly, a discordantly high  $rScO_2$  may reflect the pathophysiology of nonmetabolizing yet nonperfused tissue.<sup>11</sup> Furthermore, the presence of light-absorbing pigments (chromophores), lack of blood flow pulsatility, algorithmic factors, and the already mentioned extracerebral contamination might explain the observations of normal  $rScO_2$  before aortic clamping. If these factors can mask zero cerebral blood flow (as in brain death), the question arises whether these same factors disguise a reduced cerebral blood flow (as in focal cerebral ischemia) as well. Thus, it remains to be clarified what the quantitative and qualitative nature of cerebral ischemia must be to be detected by NIRS.

NIRS monitoring is commonly used in cardiovascular, noncardiovascular, and neonatal anesthesiology to monitor cerebral oxygenation.<sup>1,2,18</sup> In a systematic review on NIRS monitoring in awake carotid endarterectomy, Khan *et al.*<sup>24</sup> reported that the commonly applied threshold of a 20%  $rScO_2$  decrease from baseline has a low sensitivity of 70.5% (95% CI, 54.1 to 82.9%) to detect intraoperative cerebral ischemia. Therefore, NIRS monitoring misses approximately 30% of patients with cerebral ischemia (false negative rate), which limits its usefulness as a monitor of cerebral ischemia. Overall, the NIRS results between carotid endarterectomy and brain death do not compare well because the perfusion ratio of ICA to ECA is opposite: while the ECA is well-perfused in brain death, it is clamped and hence nonsupplied in carotid endarterectomy. *Vice versa*, ICA is not perfused by definition in brain death, whereas it is supplied in carotid endarterectomy (at least in cases where a shunt is inserted). A poor association between a 20% decrease in  $rScO_2$  and cerebral status was also reported in aortic arch surgery.<sup>25</sup>

Algorithms on how to treat desaturations observed using NIRS have been published and applied.<sup>26</sup> These include measures such as correcting venous return from the head by verifying head position, raising arterial blood pressure, and correcting anemia or arterial carbon dioxide and/or oxygen partial pressure.<sup>26</sup> Following our assumption that the investigated NIRS monitors measure predominantly extracerebral oxygenation, the abovementioned procedures remain effective in treating desaturations, as they affect both extracerebral and cerebral oxygenation. However, in critical brain events or diseases such as head injury, subarachnoid hemorrhage, ischemic insults, or intracranial hemorrhage, cerebral ischemia with consecutive cerebral deoxygenation occur without changes in extracerebral oxygenation. We assume that the investigated NIRS devices become unreliable under these circumstances and should not be used to monitor cerebral oxygenation in these indications. While low measured  $rScO_2$  values indicate cerebral hypoxia, normal measured  $rScO_2$  can by no means be used to infer normal cerebral oxygenation.

Our study has several limitations. First, the number of investigated organ donors is low. However, due to the great effect size of aortic clamping, we do not expect different results when including more patients. Second, cerebral perfusion arrest was explicitly shown in two patients only. Since the concept of brain death and irreversible loss of brain function is conclusive and generally accepted in medicine,<sup>15</sup> we have no doubt that any of the other patients would show anything other than a perfusion arrest, either. Third, we measured neither forehead skin oxygenation nor jugular bulb oxygenation. The first, although it is a proxy for extracerebral oxygenation, requires pulsatile blood flow, which would have been unavailable in our donors subsequent to aortic clamping. The second measures false high values under conditions of brain death, since the jugular bulb then receives influx from extracerebral instead of cerebral veins.<sup>27</sup>

Fourth, we applied the INVOS 5100C/7100 and ForeSight Elite monitors only. It remains unknown whether the observed results can be transferred to other NIRS monitors until equivalent investigations are performed.

We conclude that both the INVOS and the ForeSight monitor are affected by extracerebral contamination to an extent, that they are unable to detect severe cerebral hypoxia or anoxia under conditions of normal extracerebral oxygenation. While both NIRS monitors may guide measures to optimize arterial oxygen supply to the head, they should not be used with the intention to detect isolated cerebral desaturations.

## Acknowledgments

The support of Daniel Roes, German Organ Procurement Organization (Essen, Germany), and the in-house transplant coordinators, Patrick Jakobs, M.D., Felix Lehmann, M.D., and Johannes Weller, M.D., for their support in guiding the entire organ donation process, is gratefully acknowledged. The authors thank the participating physicians and intensive care nurses as well as surgical nurses for providing excellent care to the organ donors. In addition, the authors appreciate the support of their statistics advisor, Leonie Weinhold, Ph.D., Institute for Medical Biometry, Informatics and Epidemiology, University Hospital Bonn (Bonn, Germany). They would like to thank Lea Pöpping, Communication and Media Department, University Hospital Bonn, for designing figure 1.

## Research Support

Support was provided solely from institutional and/or departmental sources.

## Competing Interests

Drs. Soehle and Thudium received honoraria for lectures from Medtronic Inc. (Minneapolis, Minnesota). The other authors declare no competing interests.

## Correspondence

Address correspondence to Dr. Soehle: Department of Anesthesiology and Intensive Care Medicine, University Hospital Bonn, Venusberg-Campus 1, D-53127 Bonn, Germany. martin.soehle@ukbonn.de

## References

- Hogue CW, Levine A, Hudson A, Lewis C: Clinical applications of near-infrared spectroscopy monitoring in cardiovascular surgery. *ANESTHESIOLOGY* 2021; 134:784–91
- Moerman A, De Hert S: Cerebral oximetry: The standard monitor of the future? *Curr Opin Anaesthesiol* 2015; 28:703–9
- Tsai HI, Chung PC, Lee CW, Yu HP: Cerebral perfusion monitoring in acute care surgery: Current and perspective use. *Expert Rev Med Devices* 2016; 13:865–75
- Davie SN, Grocott HP: Impact of extracranial contamination on regional cerebral oxygen saturation: A comparison of three cerebral oximetry technologies. *ANESTHESIOLOGY* 2012; 116:834–40
- Eleveld N, Esquivel-Franco DC, Drost G, Absalom AR, Zeebregts CJ, de Vries JPM, Elting JWJ, Maurits NM: The influence of extracerebral tissue on continuous wave near-infrared spectroscopy in adults: A systematic review of in vivo studies. *J Clin Med* 2023; 12:2776
- Greenberg S, Murphy G, Shear T, Patel A, Simpson A, Szokol J, Avram MJ, Vender J: Extracranial contamination in the INVOS 5100C versus the FORE-SIGHT ELITE cerebral oximeter: A prospective observational crossover study in volunteers. *Can J Anaesth* 2016; 63:24–30
- Kato S, Yoshitani K, Kubota Y, Inatomi Y, Ohnishi Y: Effect of posture and extracranial contamination on results of cerebral oximetry by near-infrared spectroscopy. *J Anesth* 2017; 31:103–10
- Samra SK, Stanley JC, Zelenock GB, Dorje P: An assessment of contributions made by extracranial tissues during cerebral oximetry. *J Neurosurg Anesthesiol* 1999; 11:1–5
- Hongo K, Kobayashi S, Okudera H, Hokama M, Nakagawa F: Noninvasive cerebral optical spectroscopy: Depth-resolved measurements of cerebral haemodynamics using indocyanine green. *Neurol Res* 1995; 17:89–93
- Muellner T, Schramm W, Kwasny O, Vecsei V: Patients with increased intracranial pressure cannot be monitored using near infrared spectroscopy. *Br J Neurosurg* 1998; 12:136–9
- Schwarz G, Litscher G, Kleinert R, Jobstmann R: Cerebral oximetry in dead subjects. *J Neurosurg Anesthesiol* 1996; 8:189–93
- Germon TJ, Kane NM, Manara AR, Nelson RJ: Near-infrared spectroscopy in adults: Effects of extracranial ischaemia and intracranial hypoxia on estimation of cerebral oxygenation. *Br J Anaesth* 1994; 73:503–6
- Bickler PE, Feiner JR, Rollins MD: Factors affecting the performance of 5 cerebral oximeters during hypoxia in healthy volunteers. *Anesth Analg* 2013; 117:813–23
- Tomlin KL, Neitenbach AM, Borg U: Detection of critical cerebral desaturation thresholds by three regional oximeters during hypoxia: A pilot study in healthy volunteers. *BMC Anesthesiol* 2017; 17:6
- Brandt SA, Angstwurm H; Working Group “The Relevance of Irreversible Loss of Brain Function as a Reliable Sign of Death” of the Scientific Advisory Board within the German Medical Association: The relevance of irreversible loss of brain function as a reliable sign of death. *Dtsch Arztebl Int* 2018; 115:675–81



16. Medtronic: Introducing the INVOS 7100 regional oximetry system, 2018. Available at: <https://asiapac.medtronic.com/content/dam/covidien/library/ca/en/product/cerebral-somatic-oximetry/CA-PMR-0385-E-INVOS-7100vs5100Comparison-Brochure.pdf>. Accessed July 12, 2023.
17. Ikeda K, MacLeod DB, Grocott HP, Moretti EW, Ames W, Vacchiano C: The accuracy of a near-infrared spectroscopy cerebral oximetry device and its potential value for estimating jugular venous oxygen saturation. *Anesth Analg* 2014; 119:1381–92
18. Chan MJ, Chung T, Glassford NJ, Bellomo R: Near-infrared spectroscopy in adult cardiac surgery patients: A systematic review and meta-analysis. *J Cardiothorac Vasc Anesth* 2017; 31:1155–65
19. Harris DN, Bailey SM: Near infrared spectroscopy in adults. Does the Invos 3100 really measure intracerebral oxygenation? *Anaesthesia* 1993; 48:694–6
20. Kytta J, Ohman J, Tanskanen P, Randell T: Extracranial contribution to cerebral oximetry in brain dead patients: A report of six cases. *J Neurosurg Anesthesiol* 1999; 11:252–4
21. Strangman GE, Zhang Q, Li Z: Scalp and skull influence on near infrared photon propagation in the Colin27 brain template. *Neuroimage* 2014; 85(pt 1):136–49
22. Murkin JM, Arango M: Near-infrared spectroscopy as an index of brain and tissue oxygenation. *Br J Anaesth* 2009; 103(suppl 1):i3–13
23. Dunham CM, Sosnowski C, Porter JM, Siegal J, Kohli C: Correlation of noninvasive cerebral oximetry with cerebral perfusion in the severe head injured patient: A pilot study. *J Trauma* 2002; 52:40–6
24. Khan JM, McInnis CL, Ross-White A, Day AG, Norman PA, Boyd JG: Overview and diagnostic accuracy of near infrared spectroscopy in carotid endarterectomy: A systematic review and meta-analysis. *Eur J Vasc Endovasc Surg* 2021; 62:695–704
25. Baulig W, Bosshart M, Brueckner K, Theusinger OM, Wilhelm M, Seifert B, Bettex D, Buehler PK: Near-infrared spectroscopy does not reliably detect the cerebral status in adults during aortic arch surgery – A retrospective trial. *Int J Anesth Res* 2017; 5:456–67
26. Denault A, Deschamps A, Murkin JM: A proposed algorithm for the intraoperative use of cerebral near-infrared spectroscopy. *Semin Cardiothorac Vasc Anesth* 2007; 11:274–81
27. Minami T, Ogawa M, Sugimoto T, Katsurada K: Hyperoxia of internal jugular venous blood in brain death. *J Neurosurg* 1973; 39:442–7
